# Supplementary material
Source: Springer Nature journal article supplement (https://www.springermedizin.de/resource/supplementary/12889_2012_5024_MOESM2_ESM.pdf/9493224)
Supplement: MOESM2 [file 9493224]

|                                                |                                                                                                                                                          |
|------------------------------------------------|----------------------------------------------------------------------------------------------------------------------------------------------------------|
| <u>Uninsured-</u>                              | individuals who has neither social medical insurance* or additional/ private health insurance;                                                           |
| <u>Basic MIS only-</u>                         | individuals who has any social medical insurance only (regardless of which social medical insurance scheme) but no additional/ private health insurance; |
| <u>Additional MIS/ private insurance only-</u> | individuals who has any additional/ private medical insurance** only;                                                                                    |
| <u>Both basic and additional-</u>              | individuals who has both any social medical insurance and private health insurance                                                                       |

\*Social medical insurance delineates: Urban Resident-based Basic Medical Insurance (URBMI), Urban Employee Basic Medical Insurance (UMBMI) or the New Rural Cooperative Medical Insurance Scheme (NRCMS)

\*\*Additional/ private insurance delineates any other insurance schemes other than the social medical insurance schemes described above
